# Supplementary material for: Biomass burning related ozone damage on vegetation over the Amazon forest: a model sensitivity study
Source: Copernicus journal article supplement (doi:10.5194/acp-15-2791-2015), 2015-03-10

**A****[HadGEM2-ES]**

Averaged between: Jan 2002 and Dec 2009

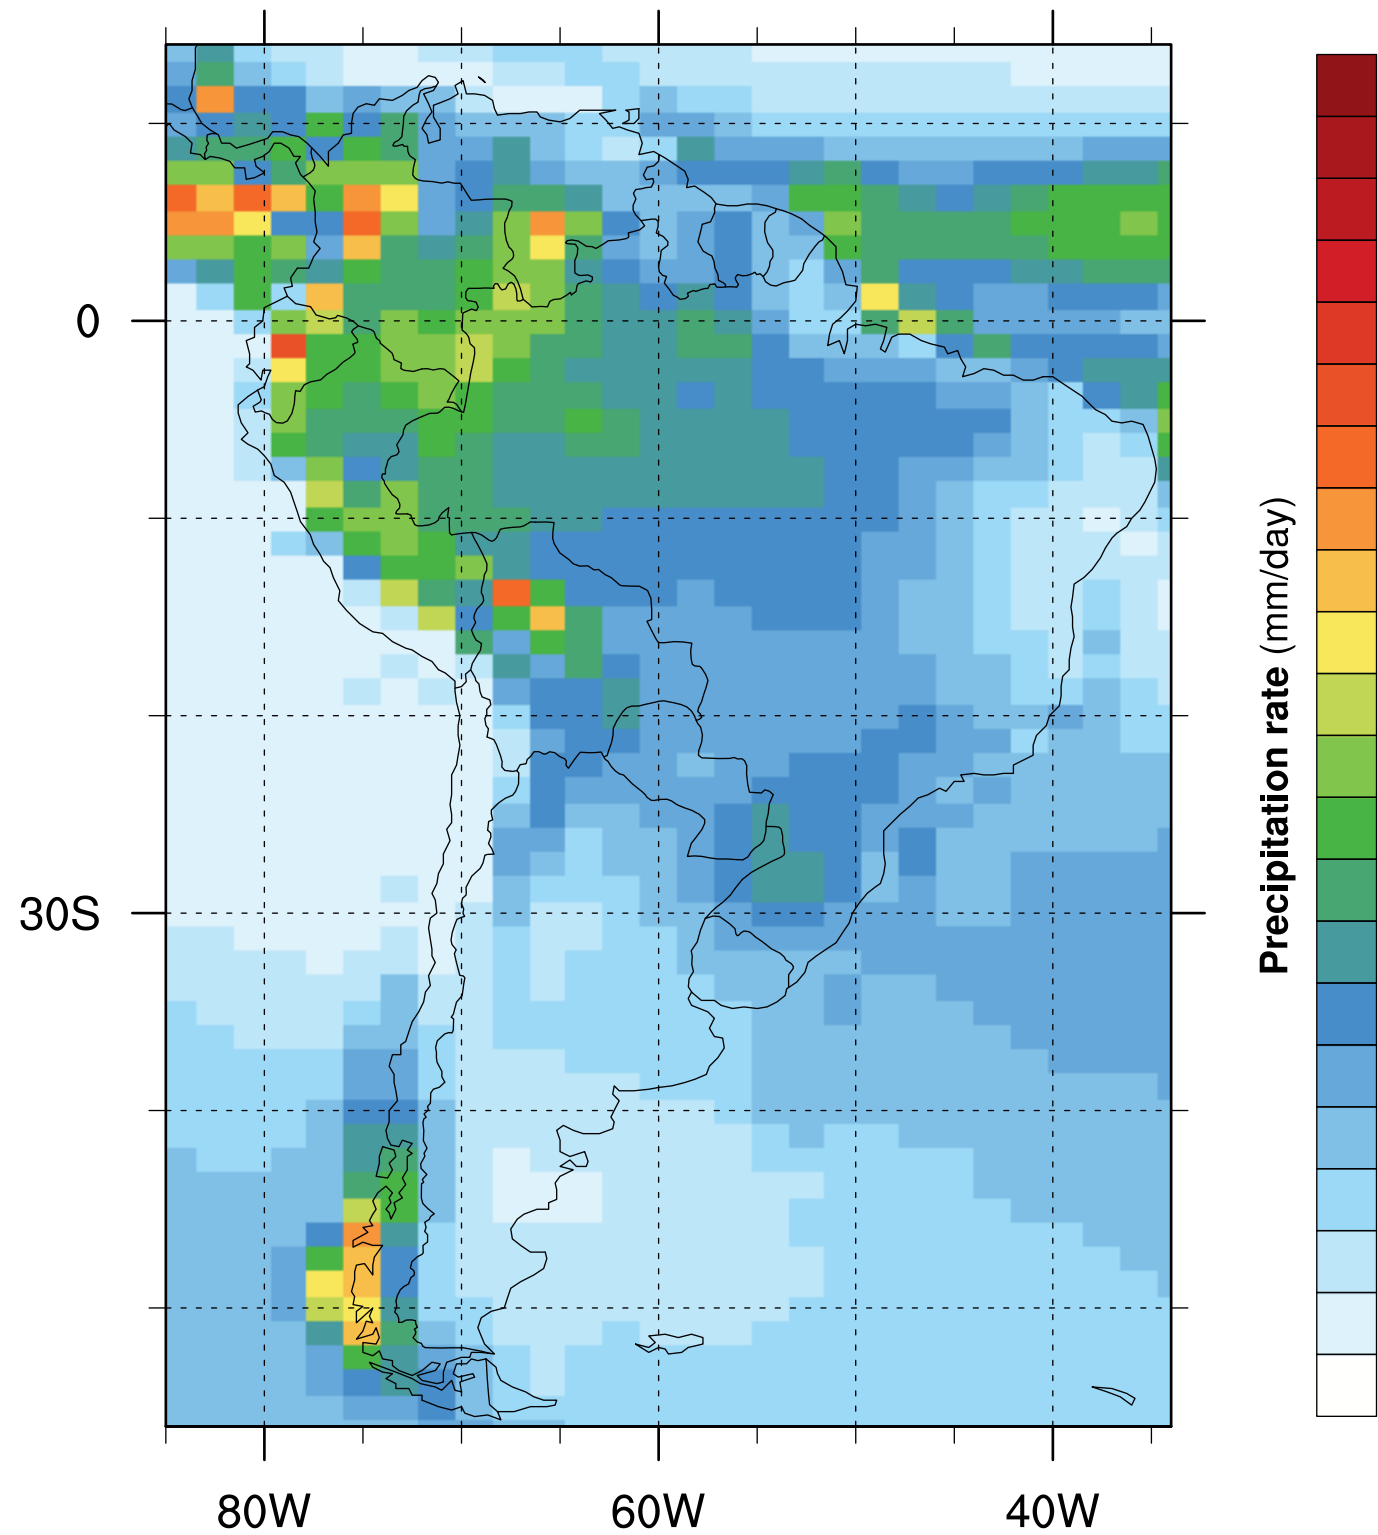**B****[CRU]**

Averaged between: Jan 2002 and Dec 2009

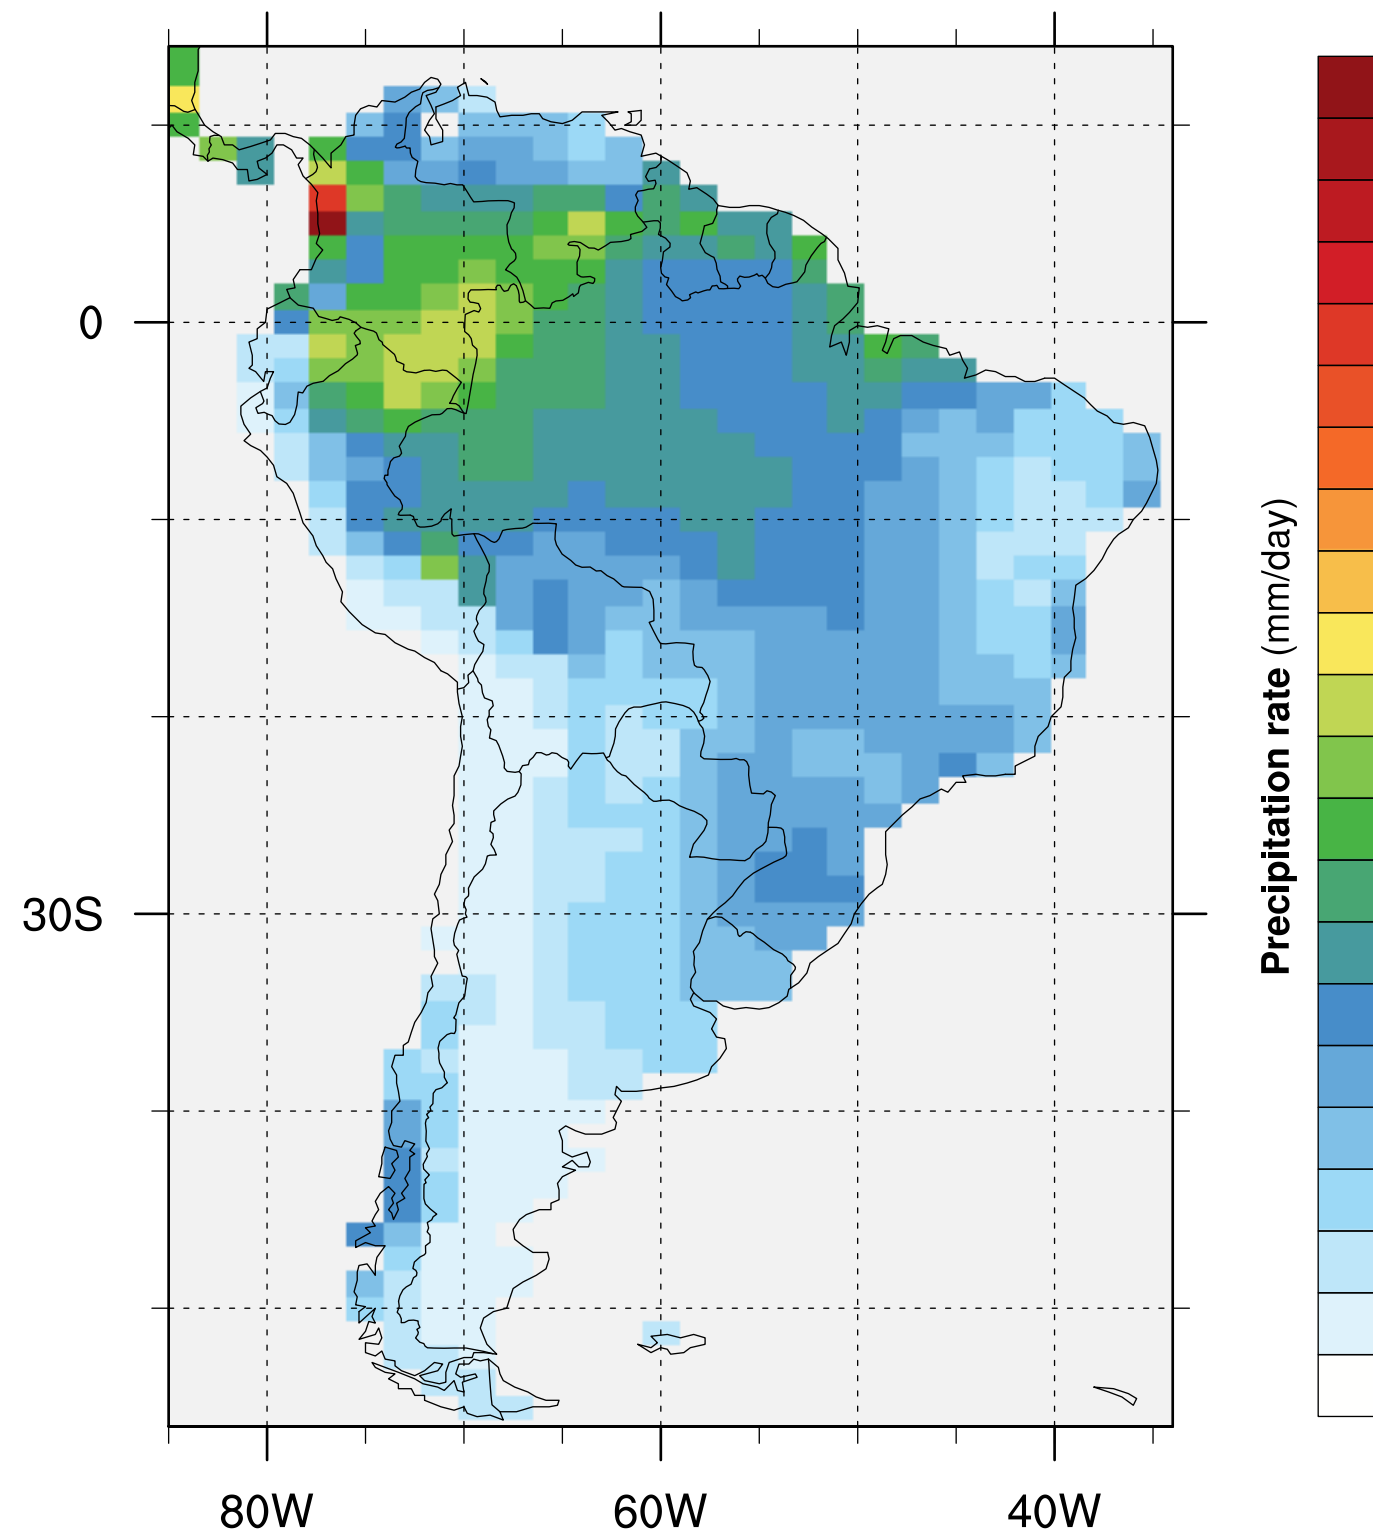**C****[HadGEM2-ES] - [CRU]**

Averaged between: Jan 2002 and Dec 2009

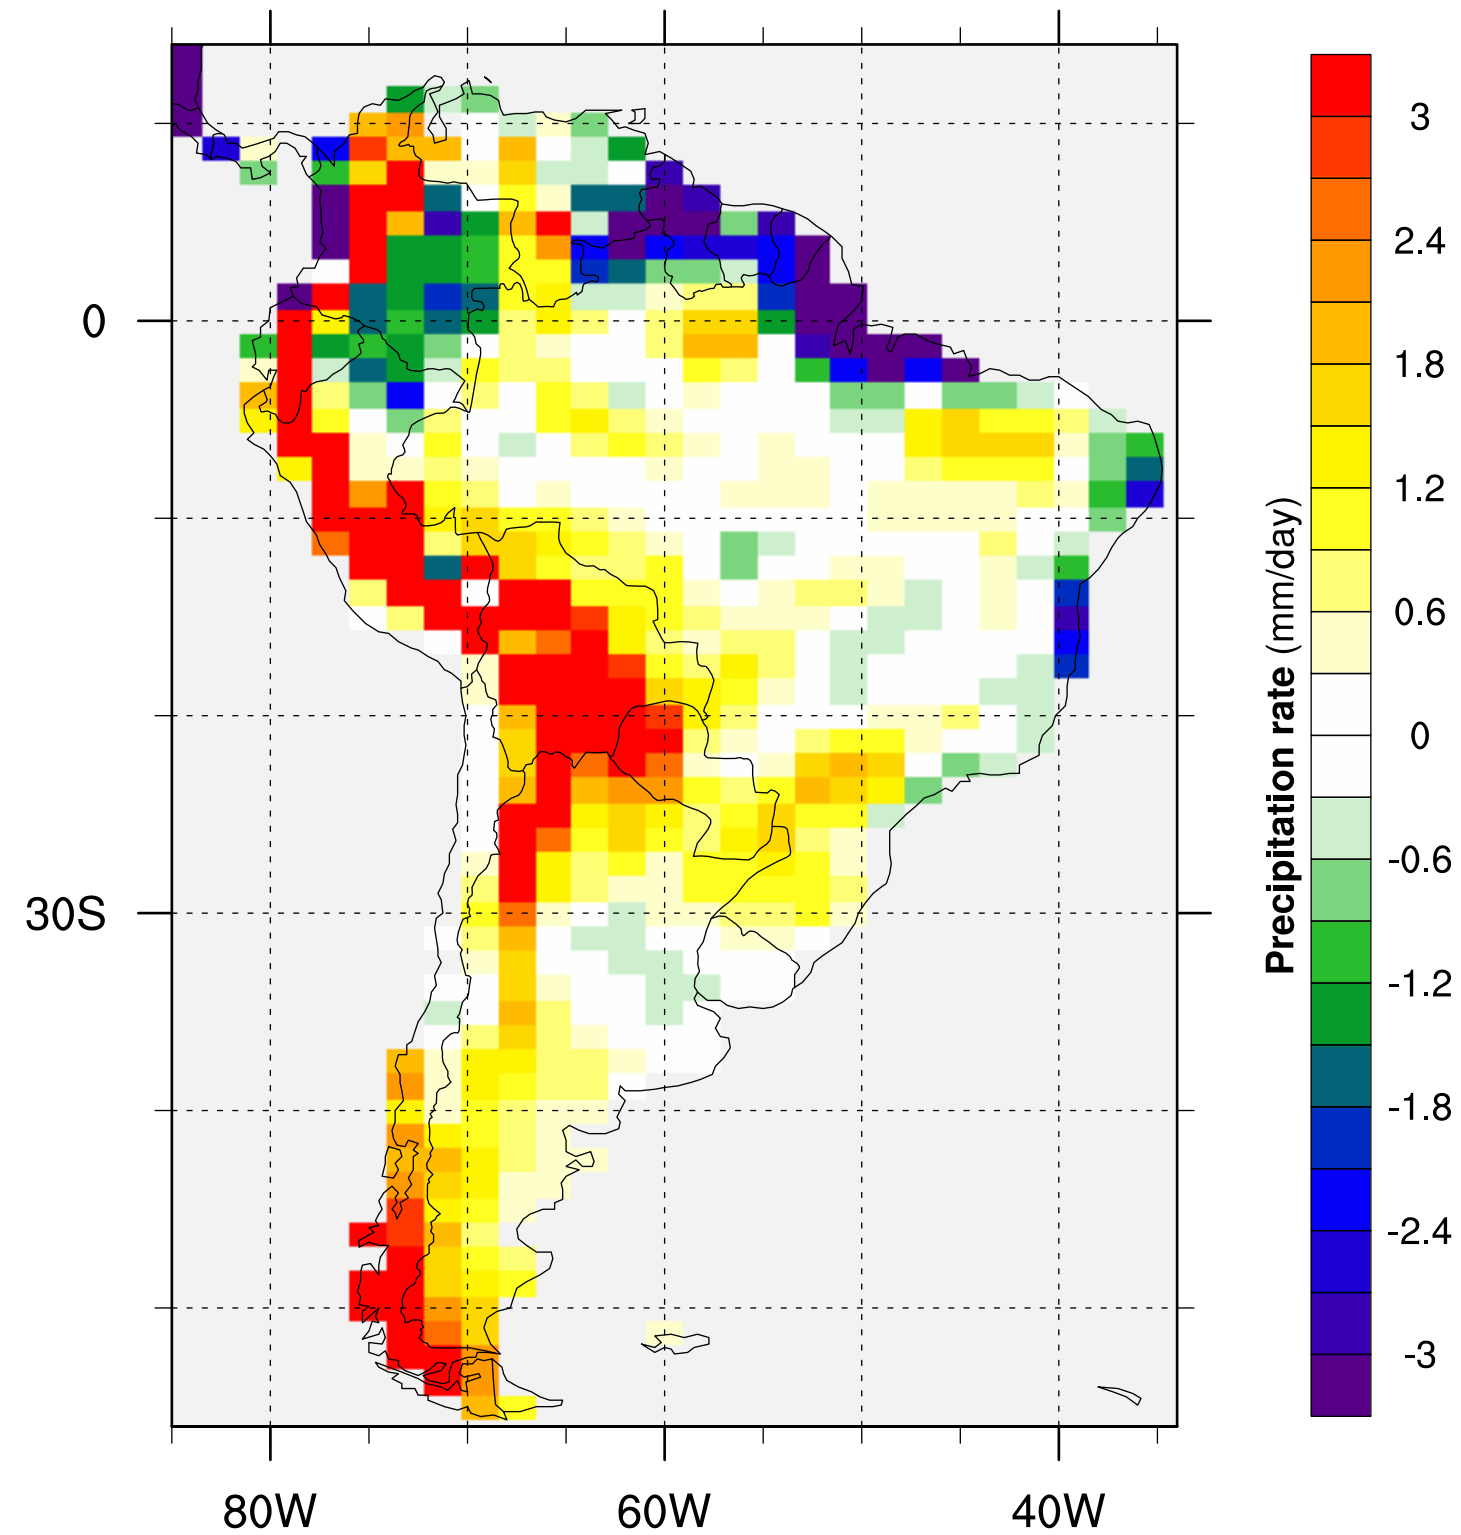

Supplement: Supplementary file 2 [file fS02.pdf › Supplements/fS02.pdf]
