# Supplementary material for: Biomass burning related ozone damage on vegetation over the Amazon forest: a model sensitivity study
Source: Copernicus journal article supplement (doi:10.5194/acp-15-2791-2015), 2015-03-10
Supplement: Supplementary file 10 [file acp-15-2791-2015-supplement-cover-letter.pdf › acp-15-2791-2015-supplement-cover-letter.pdf]

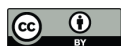

## *Supplement of*

# **Biomass burning related ozone damage on vegetation over the Amazon forest: a model sensitivity study**

**F. Pacifico et al.**

*Correspondence to:* F. Pacifico ([f.m.pacifico@exeter.ac.uk](mailto:f.m.pacifico@exeter.ac.uk))

- [acp-15-2791-2015-supplement-cover-letter.pdf](#)
- Supplements
  - .DS\_Store
  - fS01.pdf
  - fS02.pdf
  - fS03.pdf
  - fS04.pdf
  - fS05.pdf
  - fS06.pdf
  - fS07.pdf
  - fS08.pdf
  - supplementary\_material\_text.pdf
