# Supplementary figures and images for: Biomass burning related ozone damage on vegetation over the Amazon forest: a model sensitivity study
Source: Copernicus journal article supplement (doi:10.5194/acp-15-2791-2015), 2015-03-10

# Seasonal cycle (2002-2009) over the Amazon basin

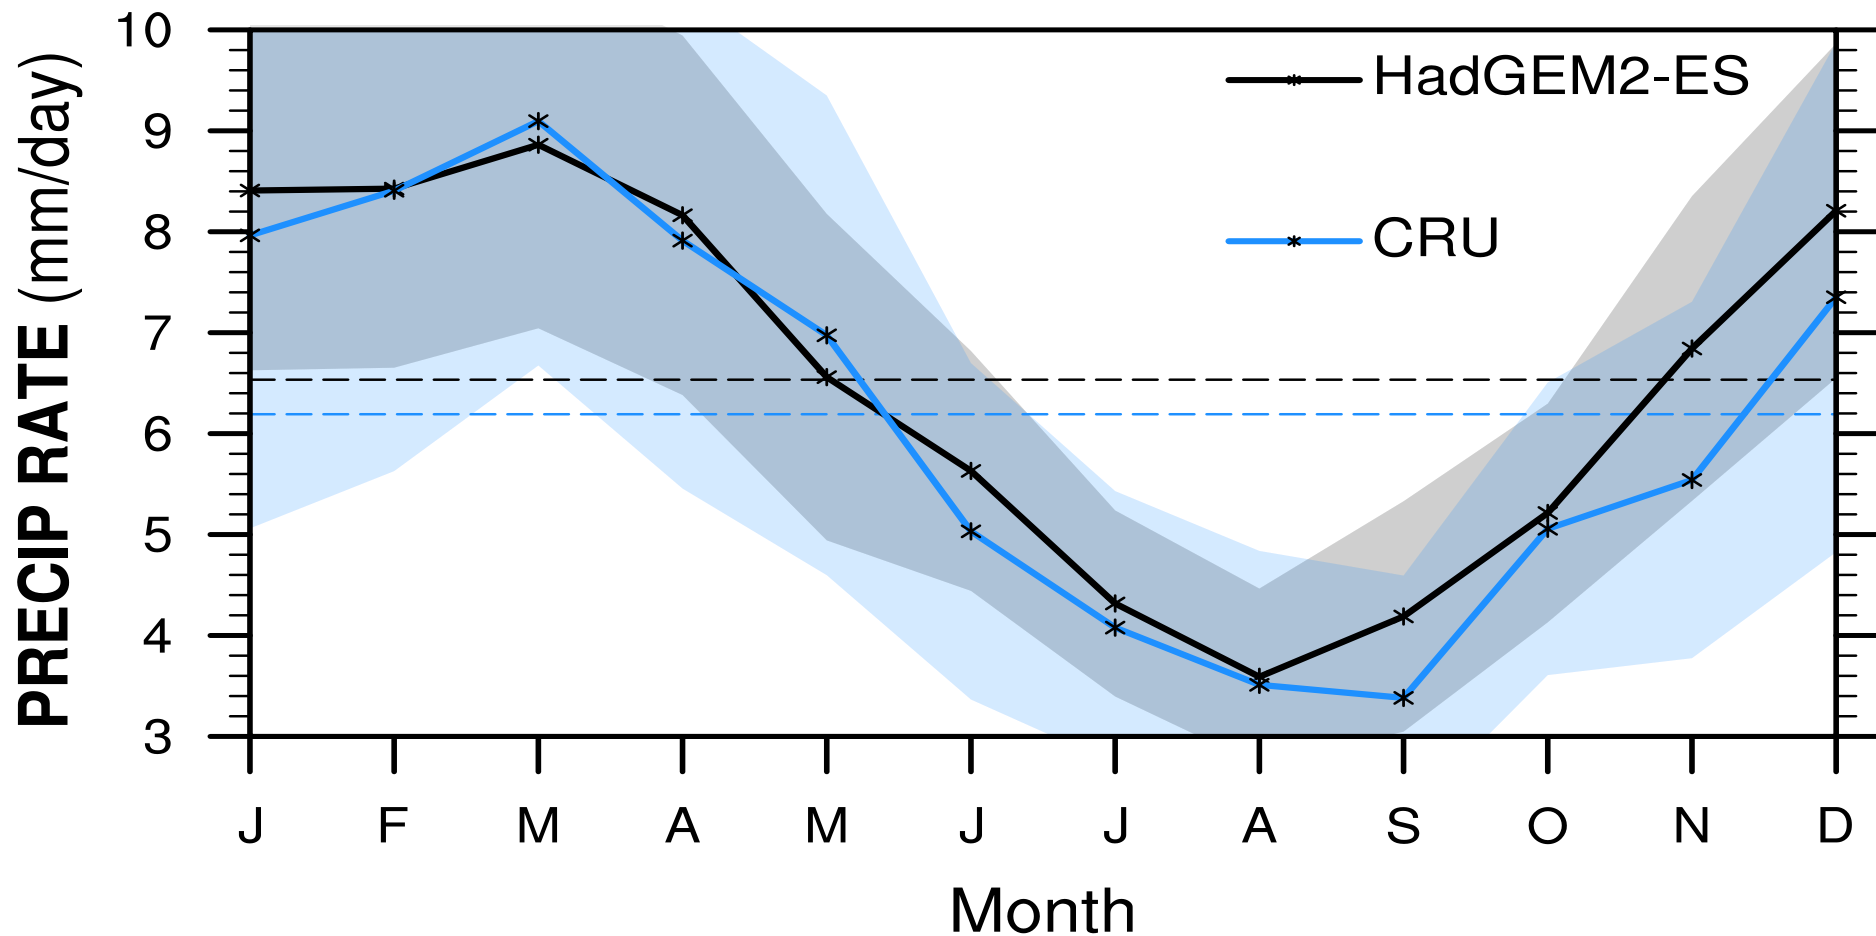

Supplement: Supplementary file 3 [file fS03.pdf › Supplements/fS03.pdf]

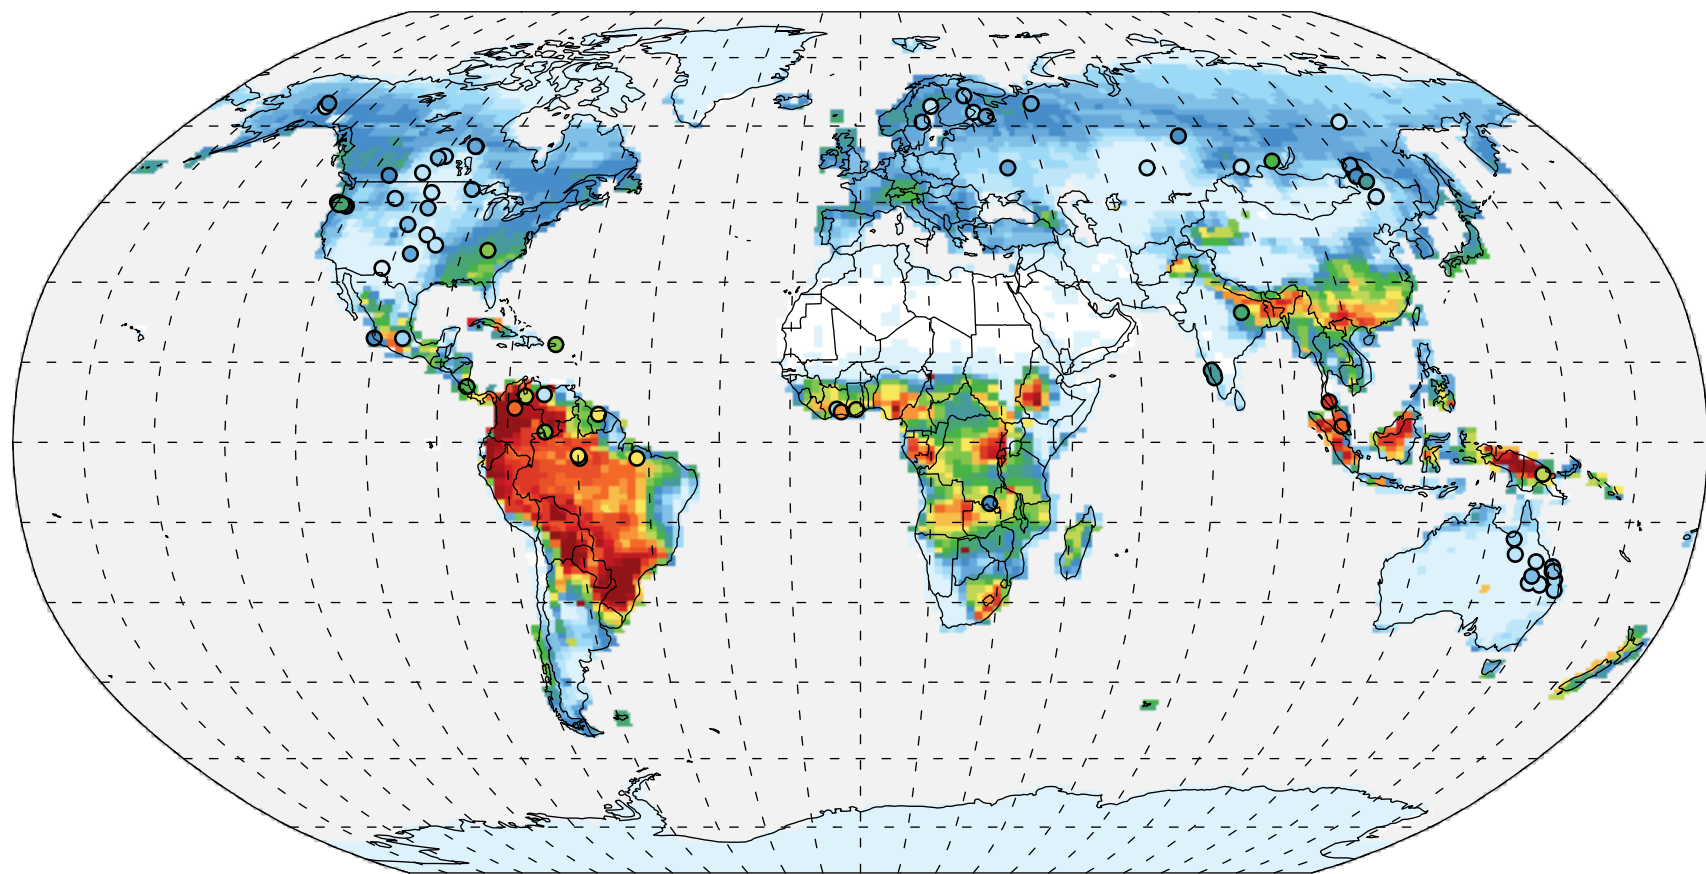

**NPP** (gC/m<sup>2</sup>/Yr)

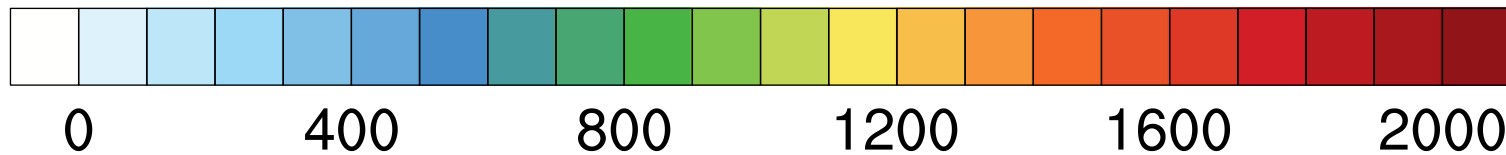

Supplement: Supplementary file 4 [file fS04.pdf › Supplements/fS04.pdf]

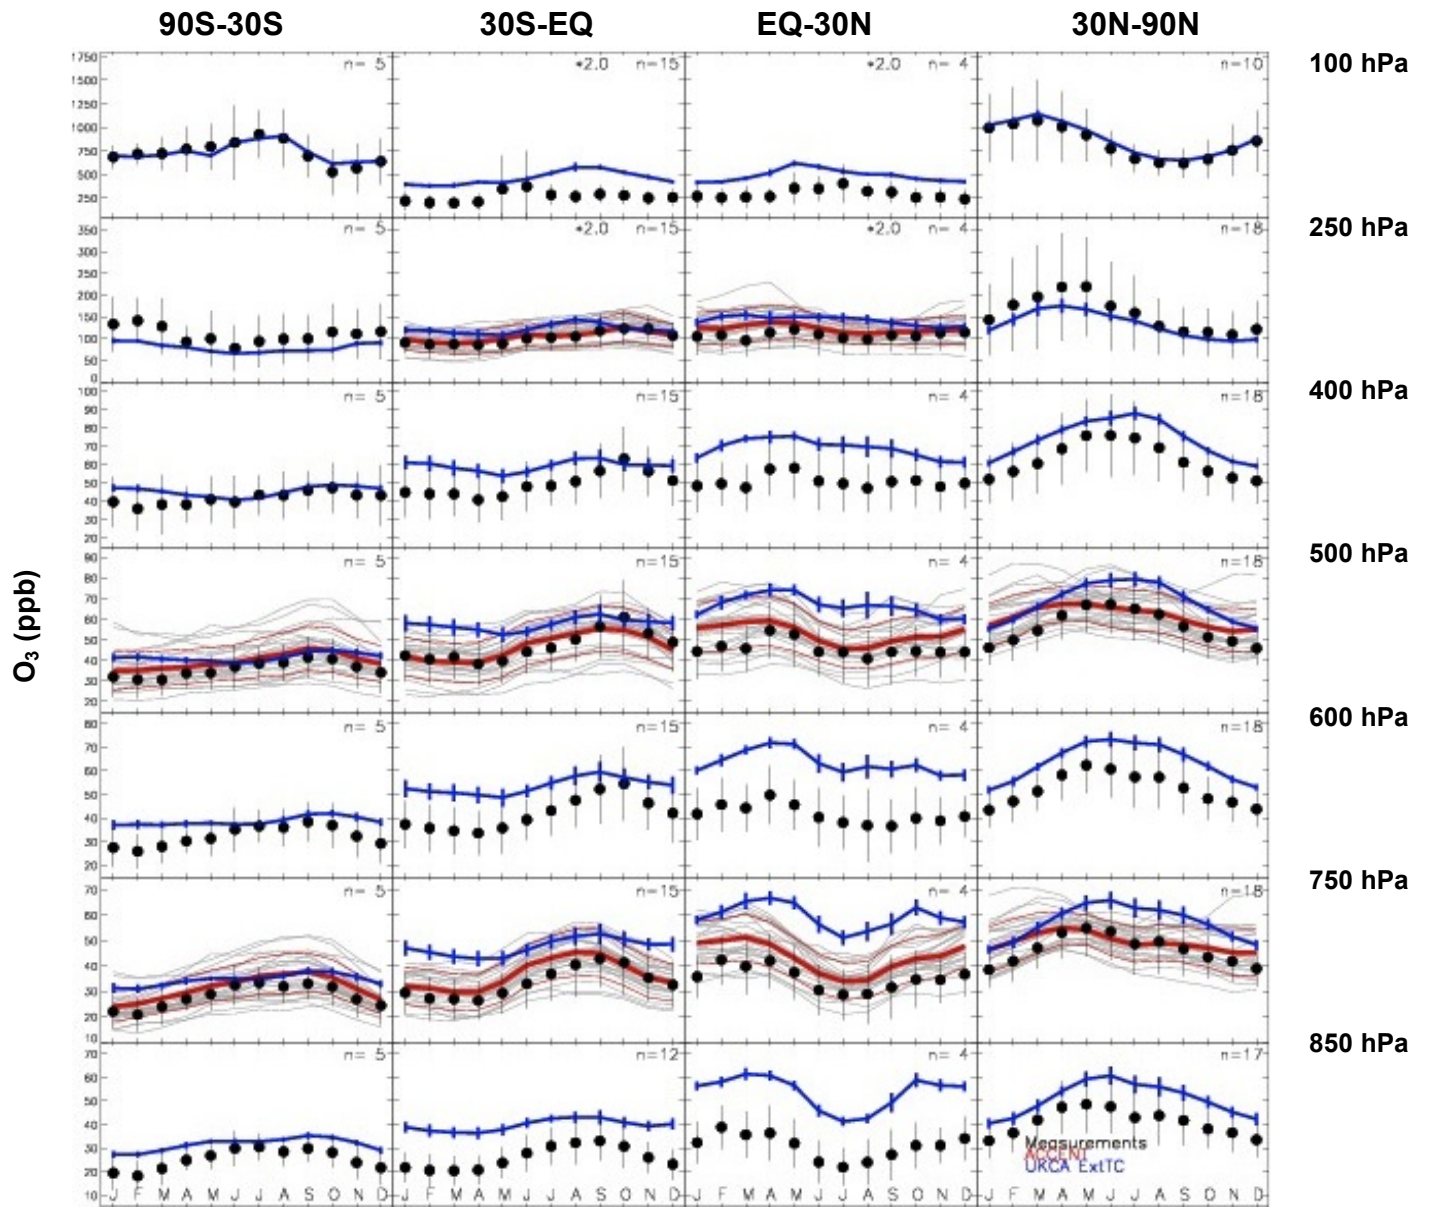

Supplement: Supplementary file 5 [file fS05.pdf › Supplements/fS05.pdf]

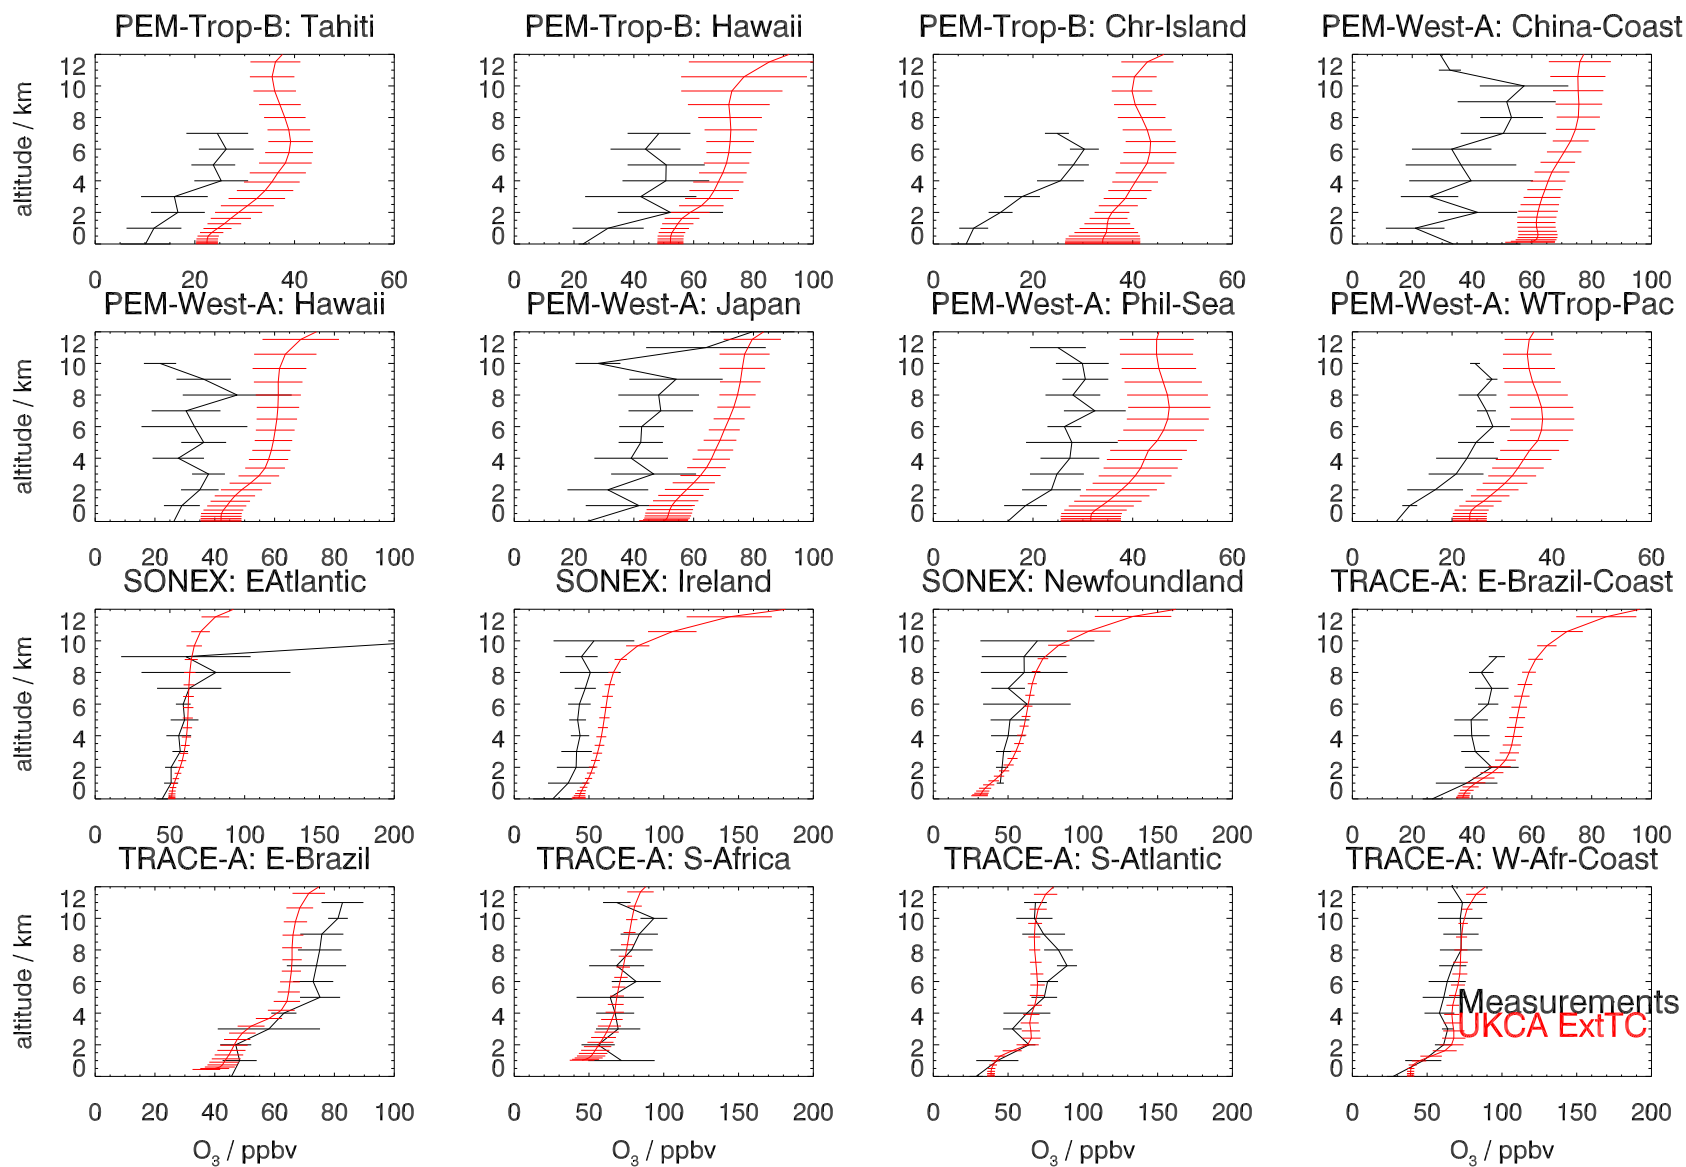

Supplement: Supplementary file 6 [file fS06.pdf › Supplements/fS06.pdf]

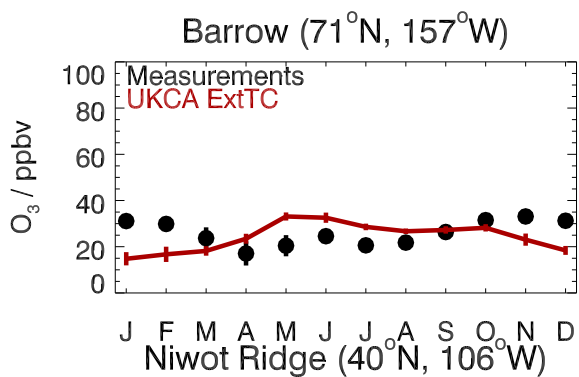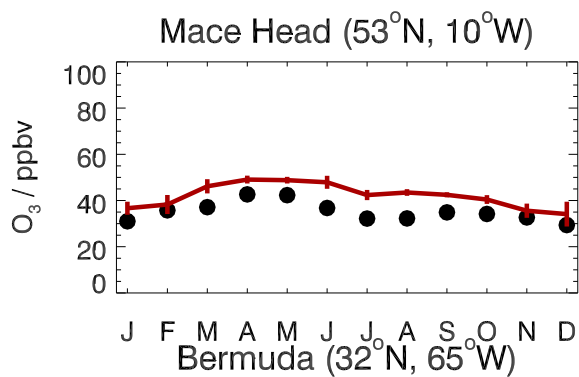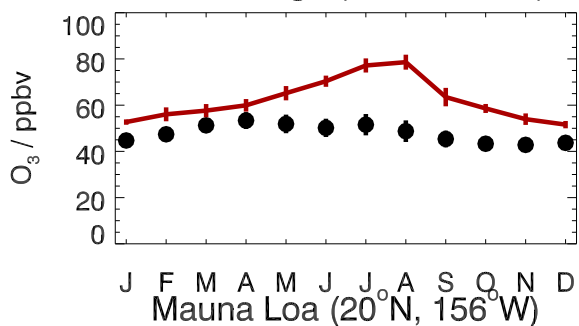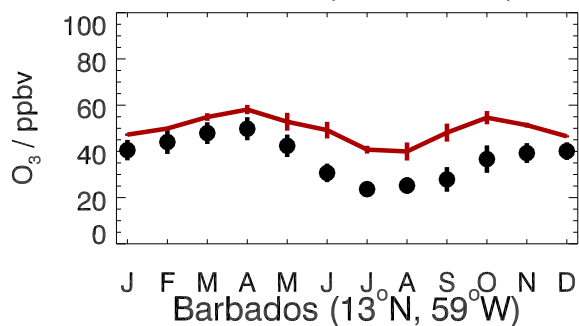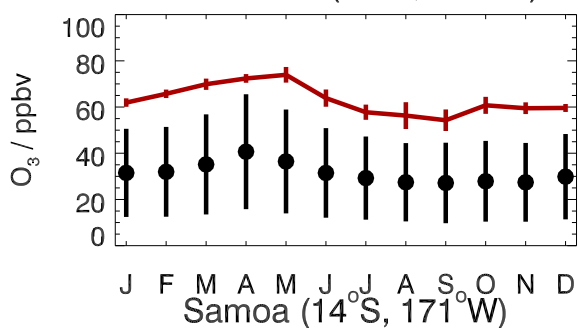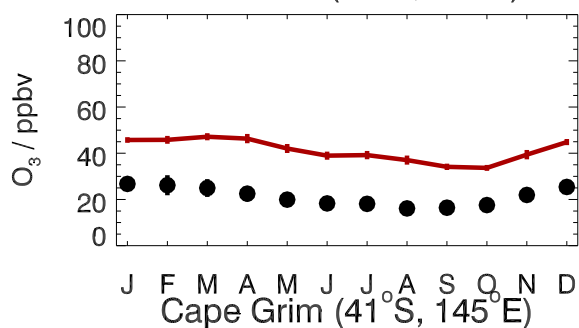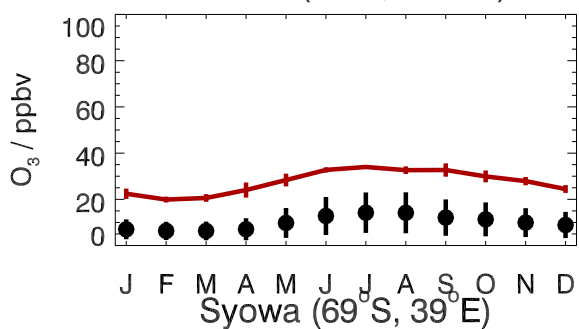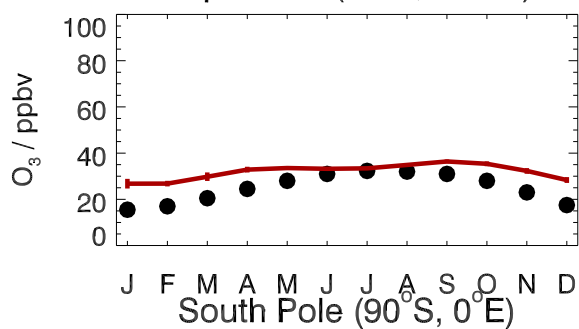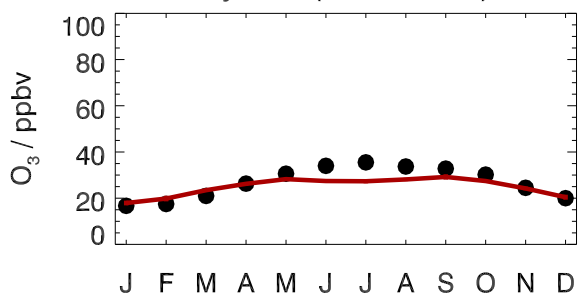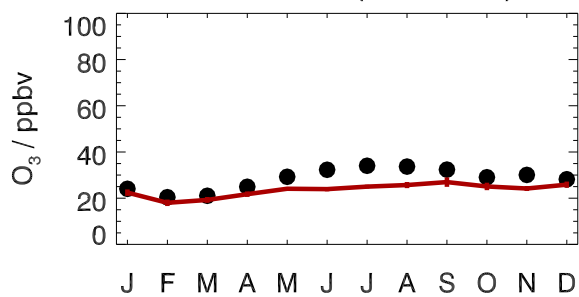

Supplement: Supplementary file 7 [file fS07.pdf › Supplements/fS07.pdf]

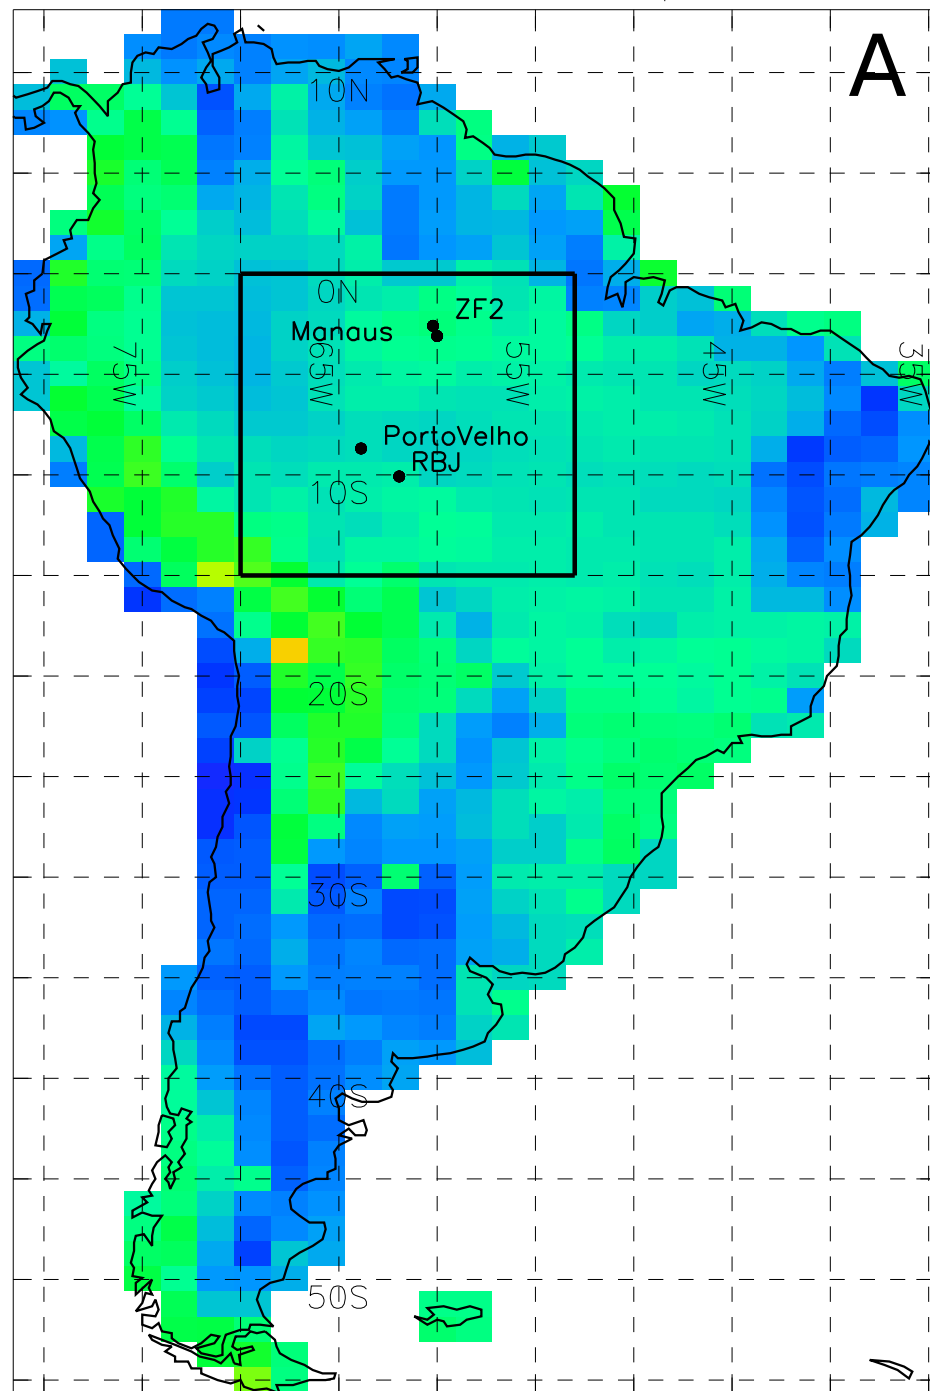

0.1 0.2 0.3 0.4 0.5 0.6 0.7 0.8 0.9 1 1.1 1.2

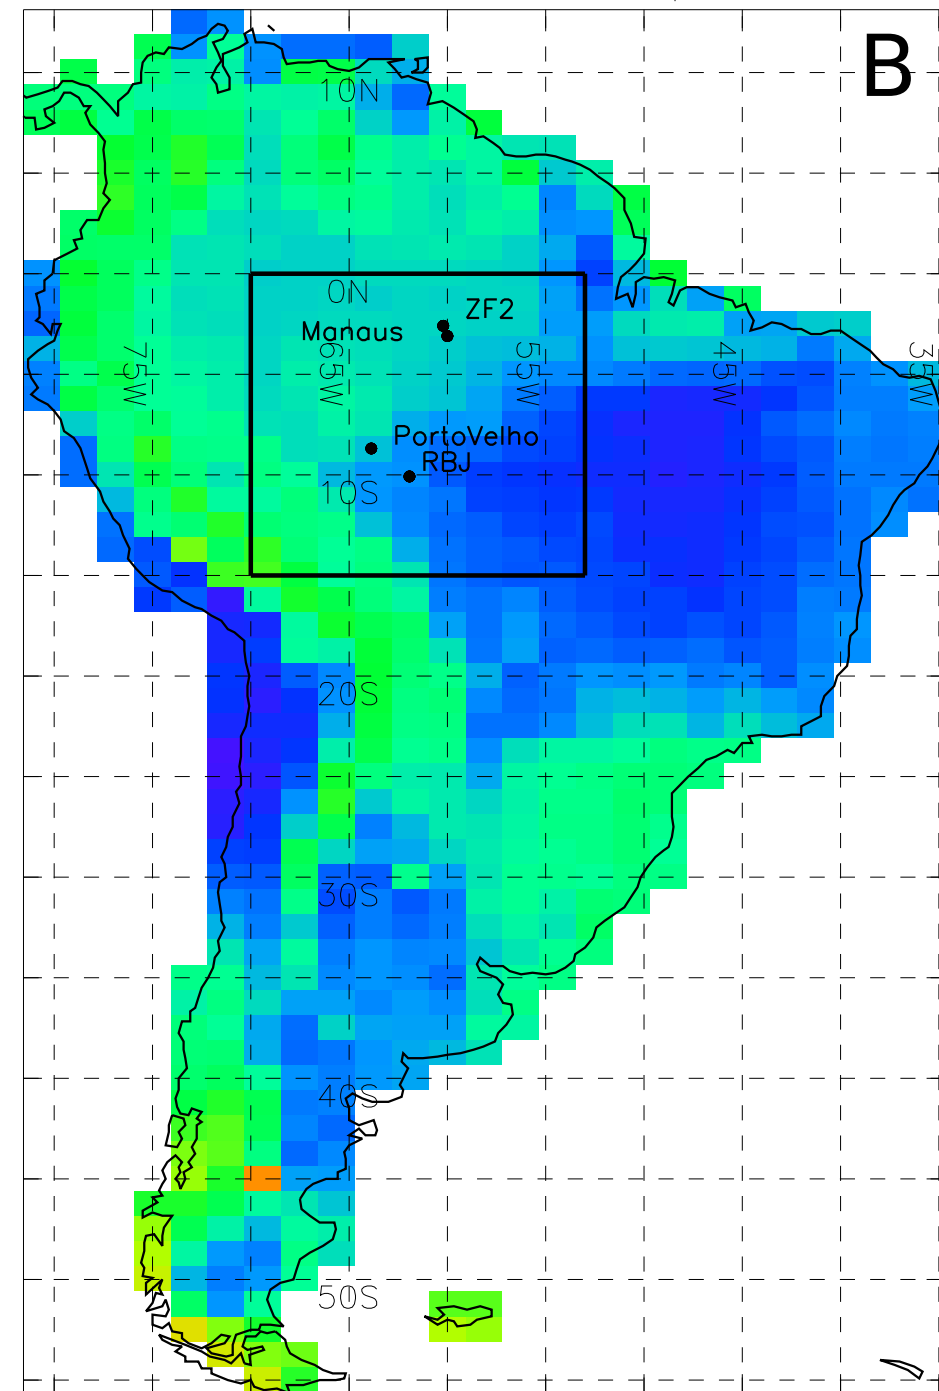

0.1 0.2 0.3 0.4 0.5 0.6 0.7 0.8 0.9 1 1.1 1.2

Supplement: Supplementary file 8 [file fS08.pdf › Supplements/fS08.pdf]
